# Supplementary material for: Microwave-assisted synthesis of bovine serum albumin–gold nanoclusters and their fluorescence-quenched sensing of Hg2+ ions
Source: Royal Society of Chemistry journal article supplement (doi:10.1039/c5nj02263k), 2015-11-10
Supplement: c5nj02263k1.pdf [file c5nj02263k1.pdf]

## Supporting information

### **Microwave-Assisted Synthesis of Bovine Serum Albumin-Gold Nanoclusters and Their Fluorescence-Quenched Sensing of Hg<sup>2+</sup> ions**

Nai-Yue Hsu and Yang-Wei Lin\*

Department of Chemistry, National Changhua University of Education, Changhua,  
Taiwan

Address correspondence to these authors at Department of Chemistry, National  
Changhua University of Education, Changhua City, PO Box 500, Taiwan; Fax:

+886-4-721-1190; E-mail: [linywjerry@cc.ncue.edu.tw](mailto:linywjerry@cc.ncue.edu.tw)

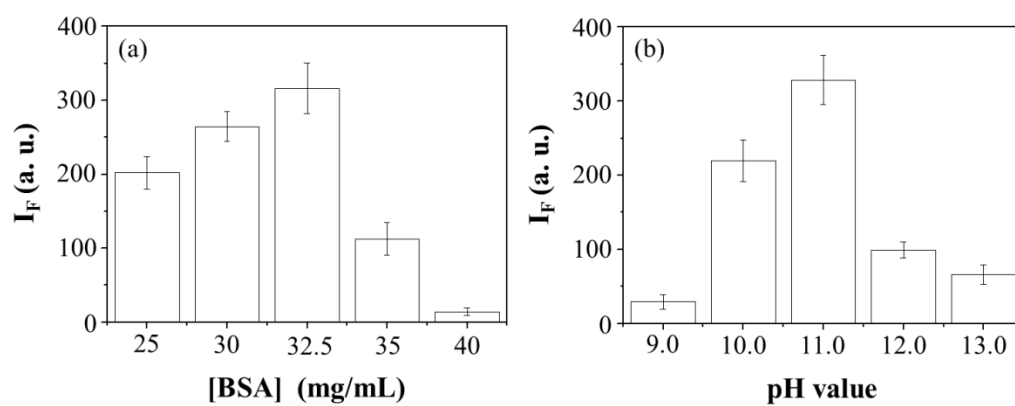

**Figure S1.** Fluorescence intensities of BSA-Au NCs prepared using (a) various BSA concentrations and (b) pH.

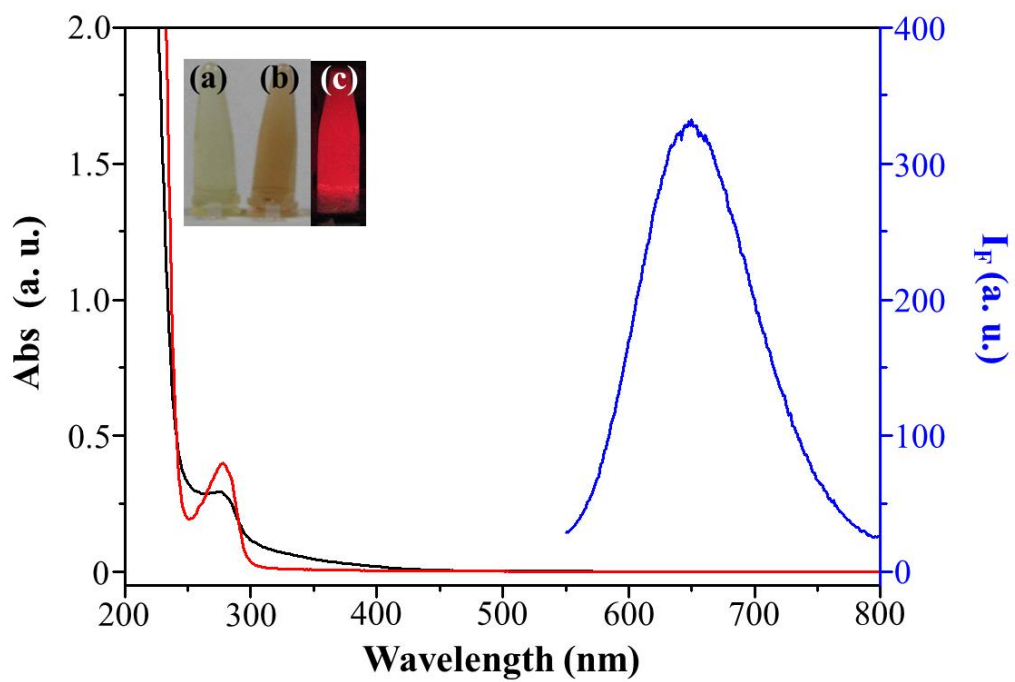

**Figure S2.** Absorption spectra of BSA (red line) and BSA-Au NCs (black line). Fluorescence spectrum of BSA-Au NCs prepared under optimal conditions. The inset displays the images of (a) BSA and (b) BSA-Au NCs under broad daylight and (c) BSA-Au NCs under UV light ( $\lambda_{ex}$ : 365 nm).

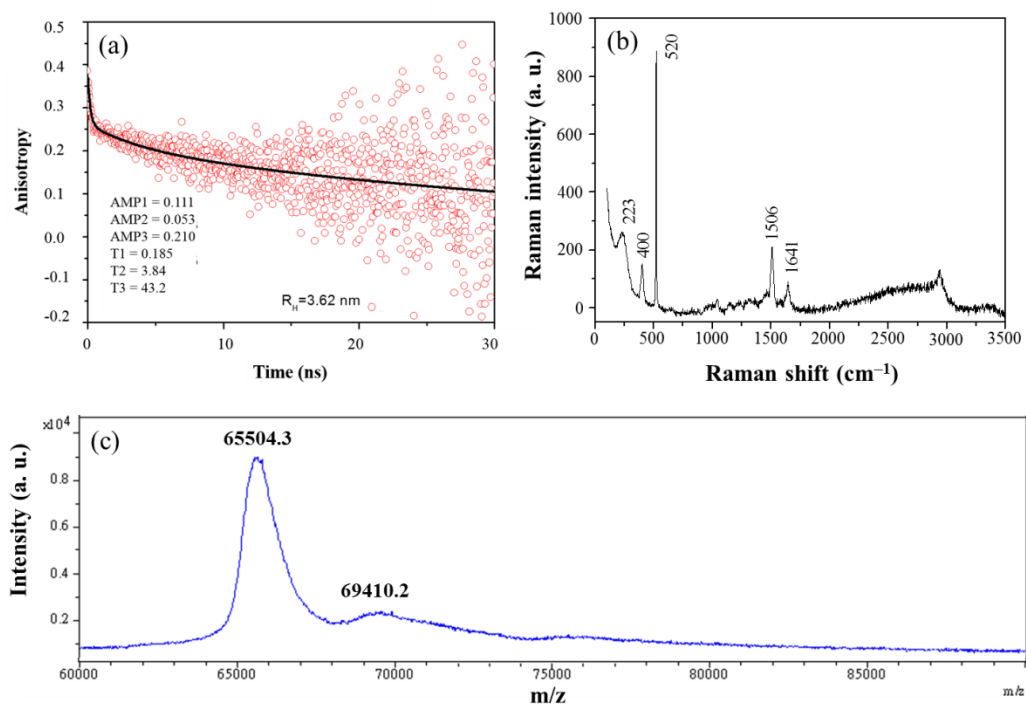

**Figure S3.** (a) Fluorescence anisotropy, (b) Raman, and (c) MALDI-MS spectra of BSA-Au NCs prepared under optimal conditions.

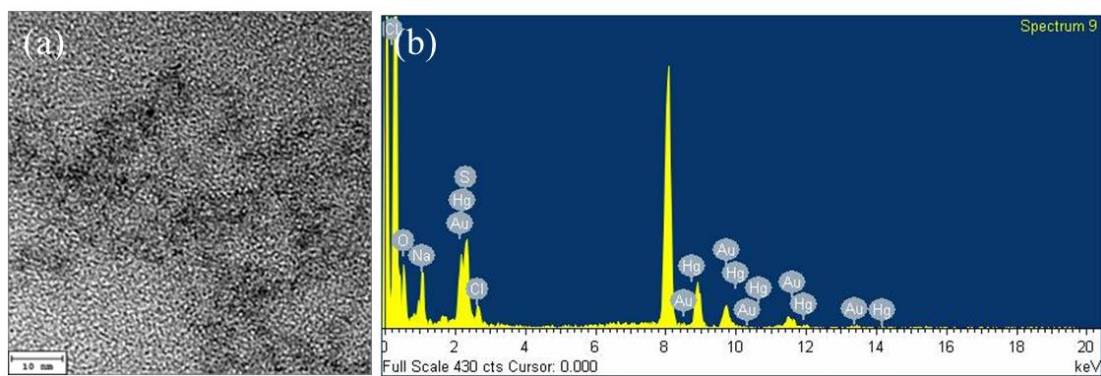

**Figure S4.** (a) TEM images and (b) EDS spectrum of BSA-Au NCs in the presence of  $\text{Hg}^{2+}$  ions ( $1.0 \mu\text{M}$ ).

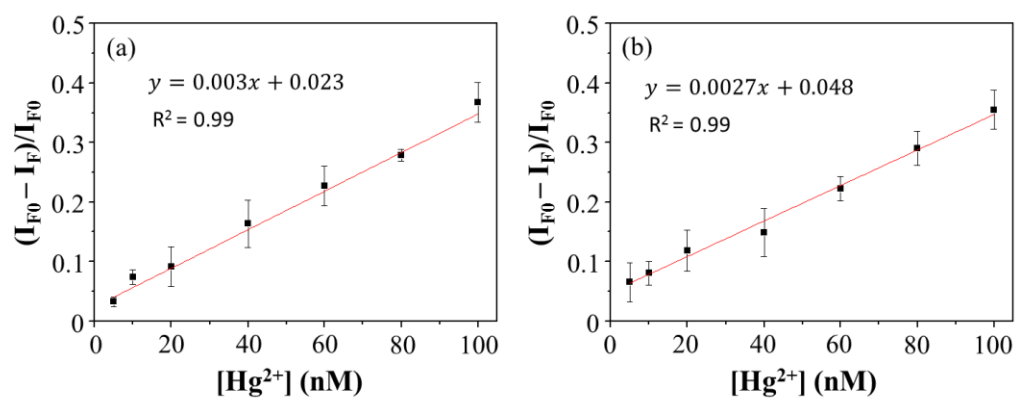

**Figure S5.** Standard addition analyses of (a) pond and (b) seawater samples examined using the BSA-Au NC probe. The aliquots of the samples were spiked with  $Hg^{2+}$  (5–100 nM).

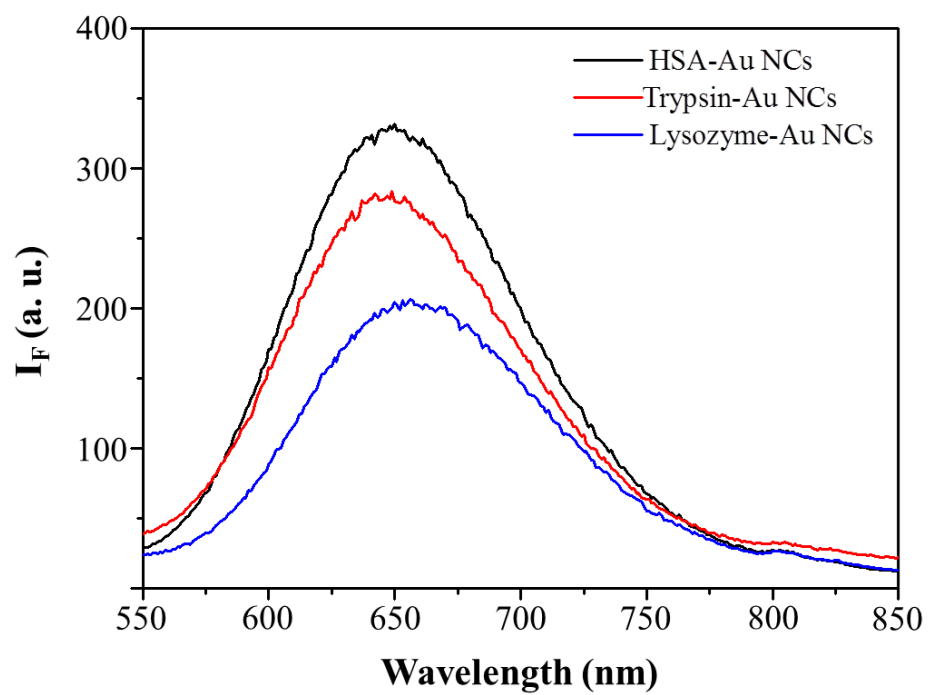

**Figure S6.** Fluorescence spectra of different kinds of protein-stabilized Au NCs. A MW programme consisting of 40 sec MW irradiation, 1.0 min pause, 40 sec MW irradiation, 1.0 min pause, and 40 sec MW irradiation was applied to prepare different kinds of protein-stabilized Au NCs.
